# Supplementary material for: Primate-specific SSX1 is required for CPSF6-dependent spermatocyte transcription and human fertility
Source: Research Square preprint supplement (doi:10.21203/rs.3.rs-8516172/v1), 2026-02-16
Supplement: Supplementary file 1 [file 34ce392db77466b597b2391f.docx]

**Supplementary Figures.**


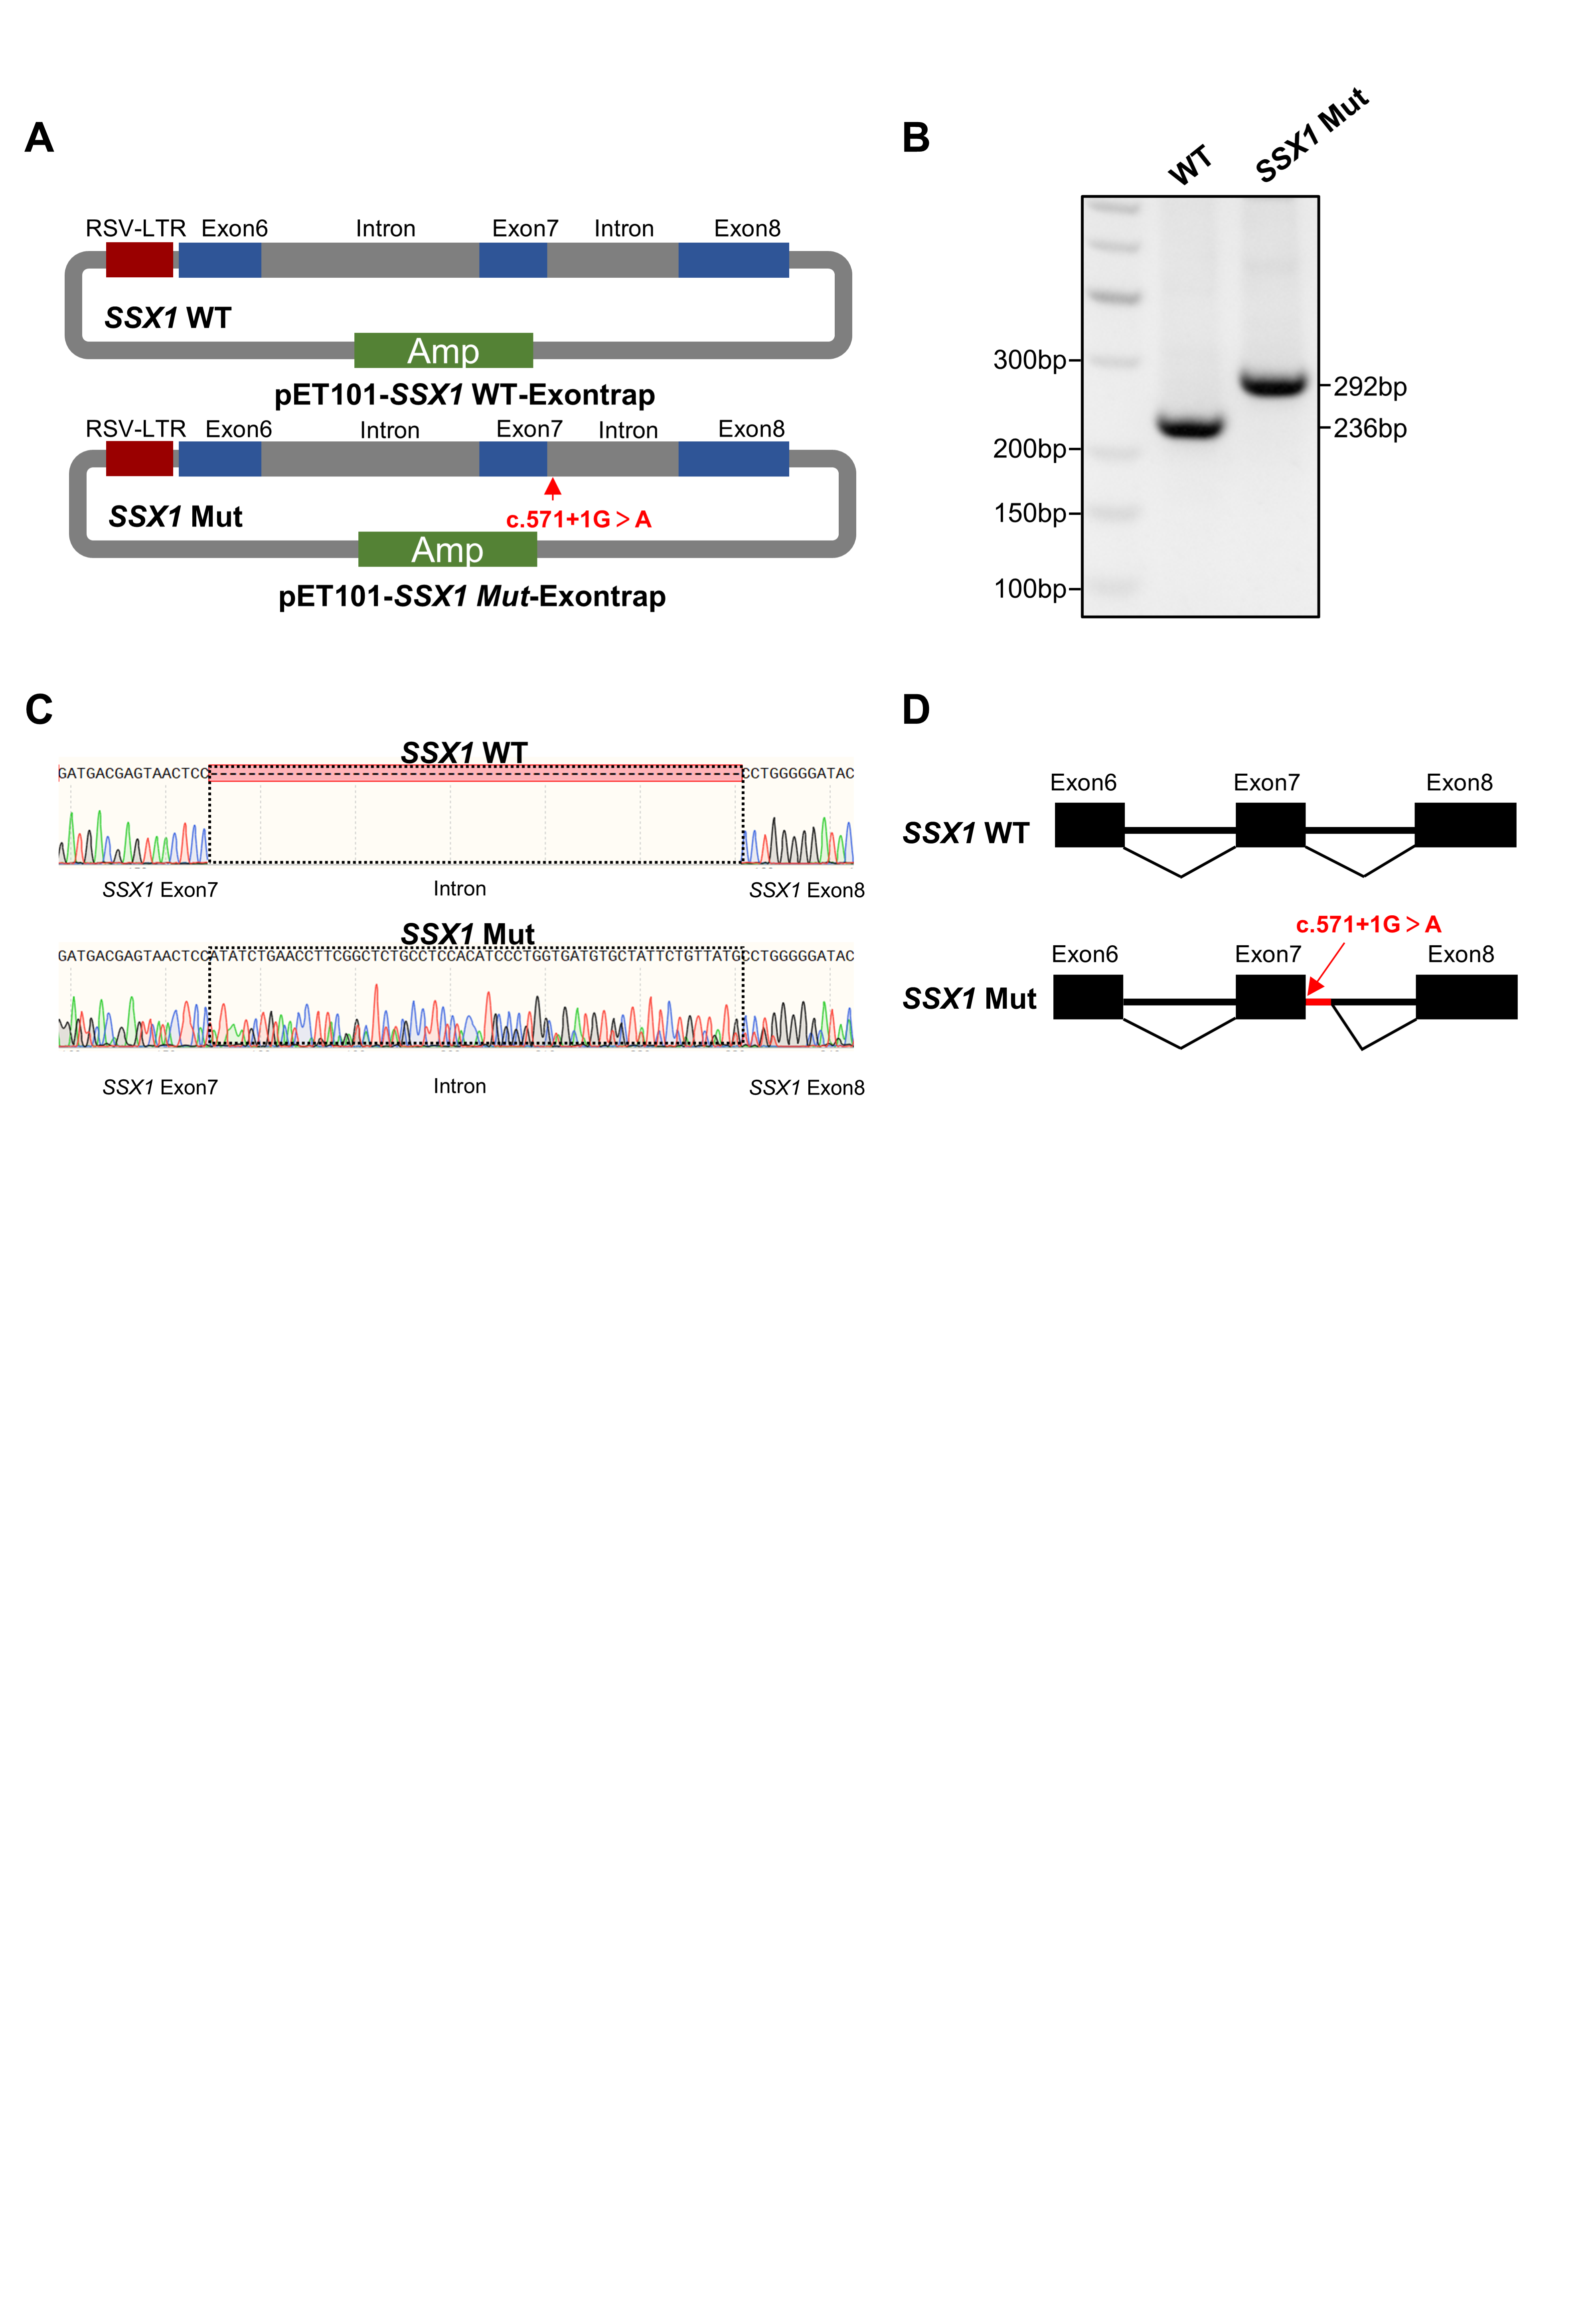


**Supplemental Fig. 1. Functional analysis of the *SSX1*c.571+1G>A variant on pre-mRNA splicing.**

**A** Schematic representation of the exon-trap minigene constructs. WT, wild type; Mut, mutant.

**B** RT-PCR analysis of transcripts derived from the minigene constructs.

**C** Sanger sequencing of the RT-PCR products.

**D** Schematic diagram of the splicing alteration caused by the *SSX1*c.571+1G>A variant.

**
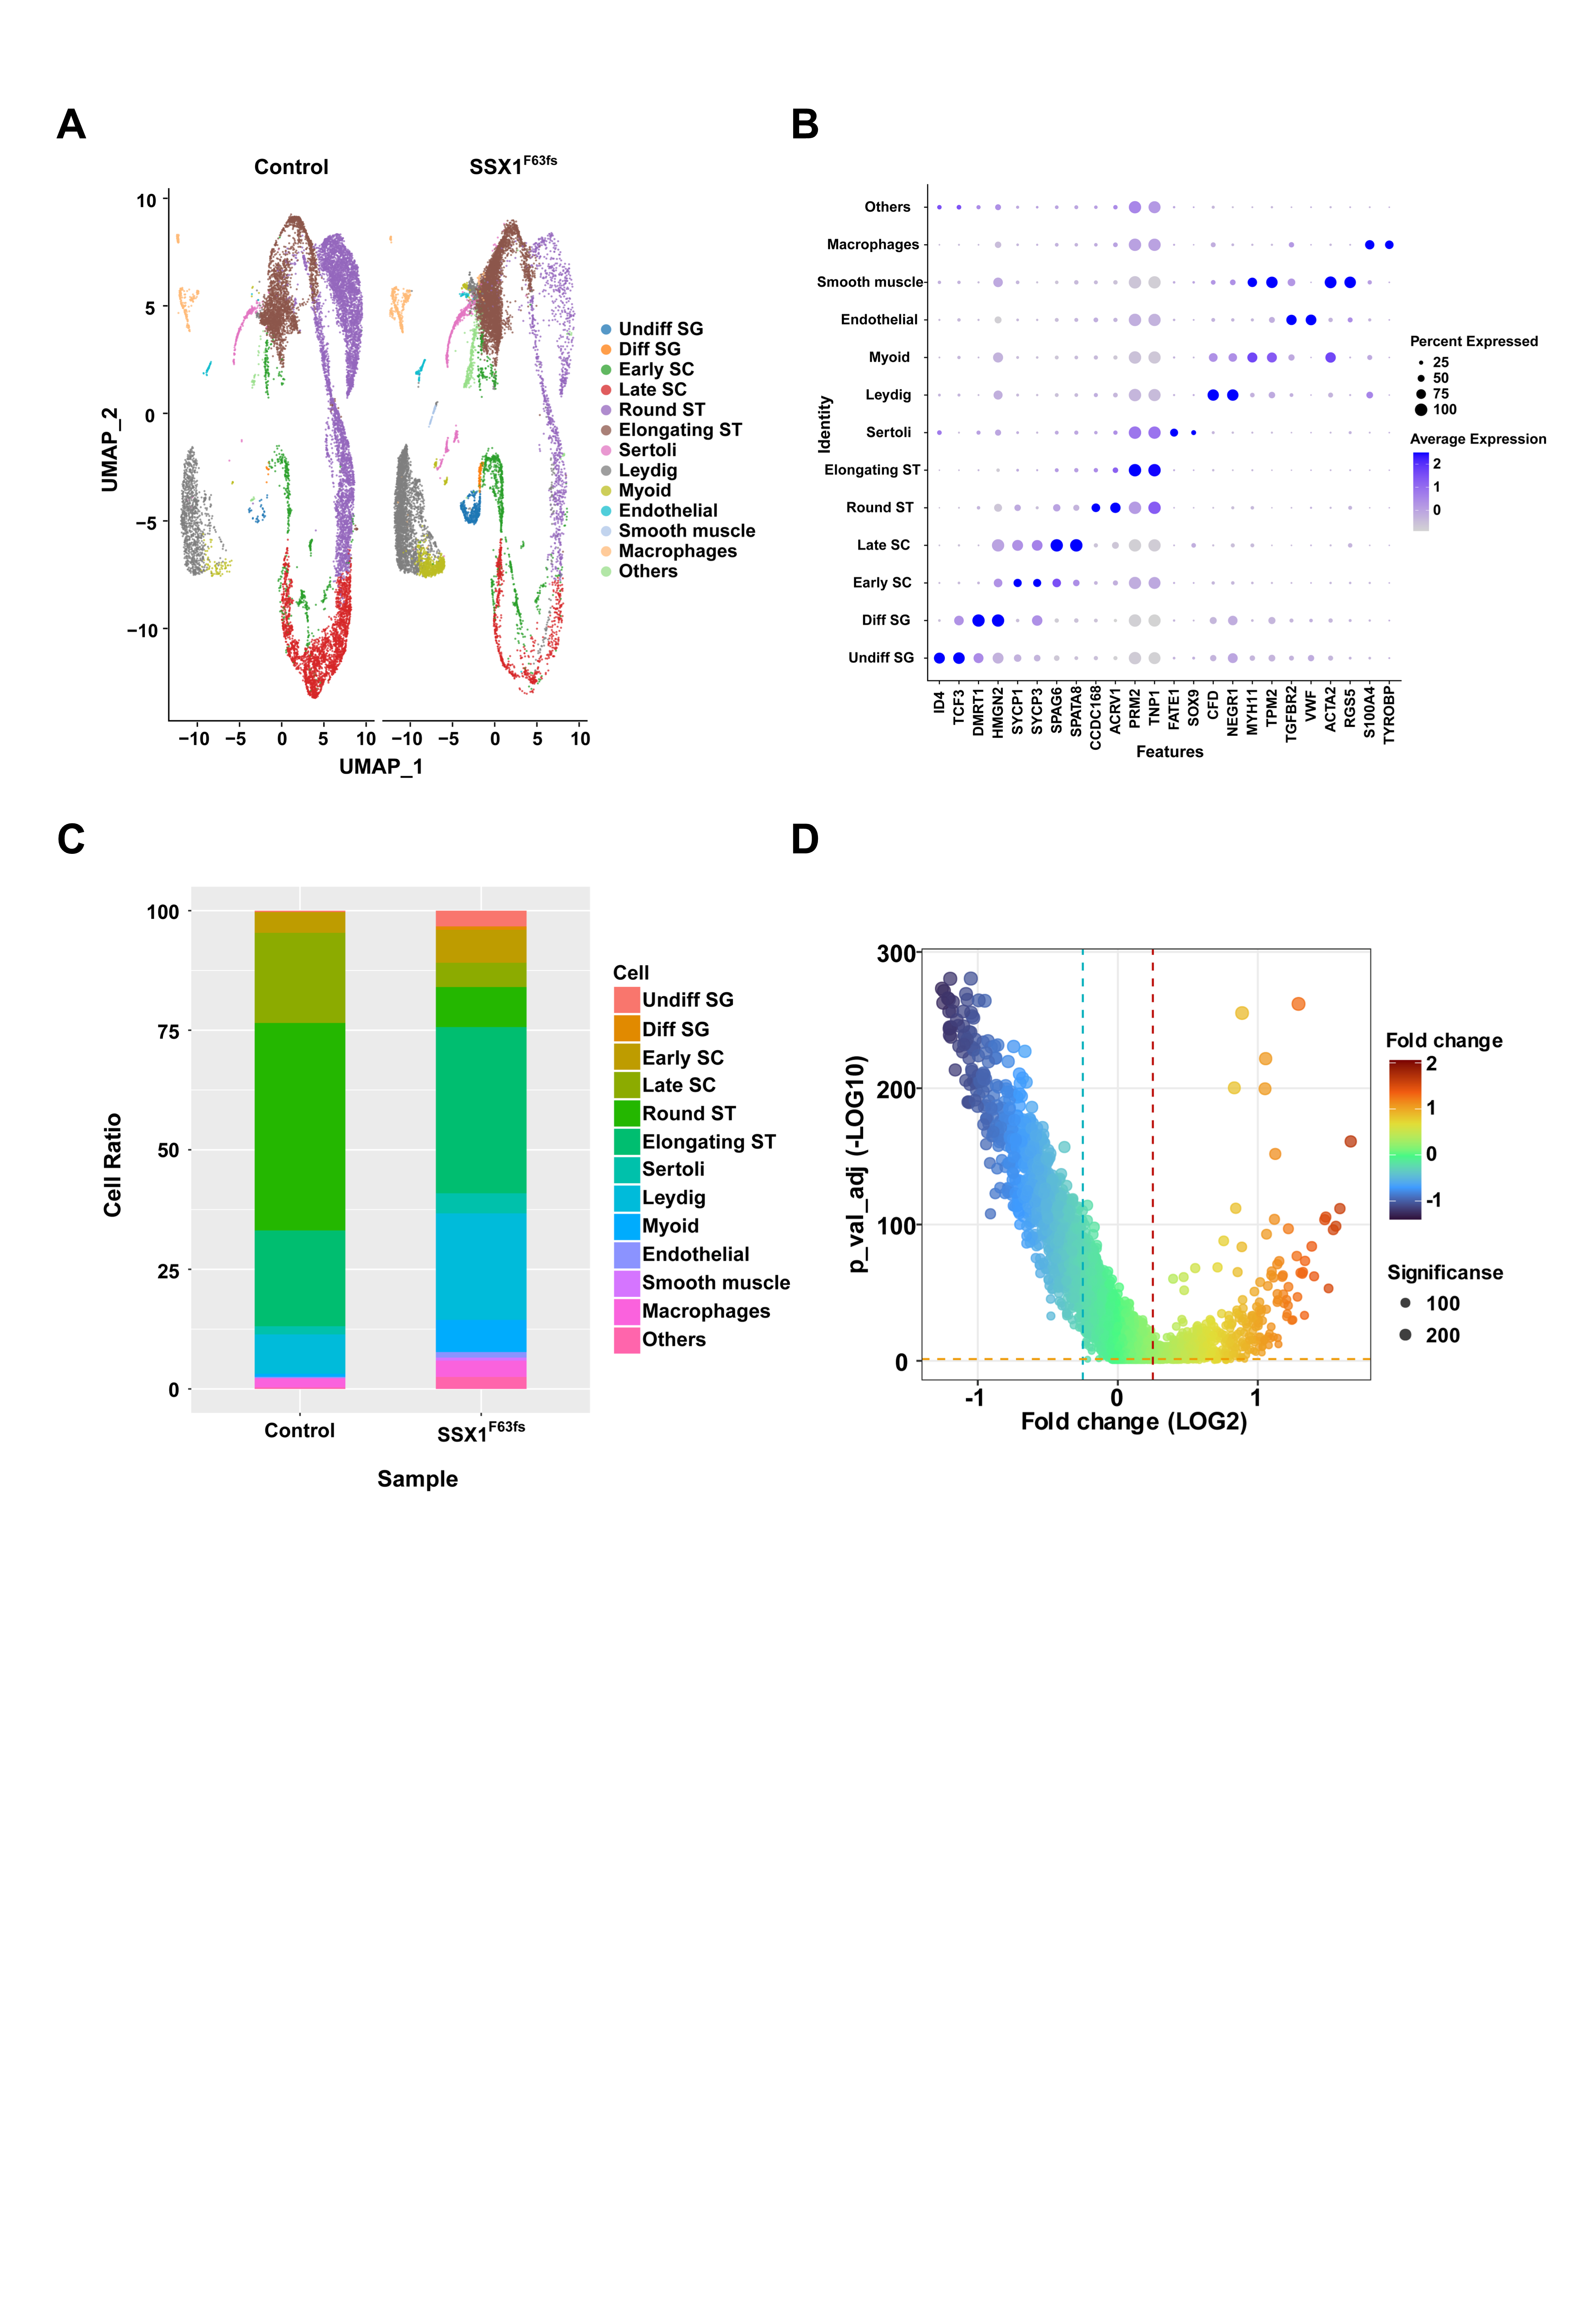
**

**Supplemental Fig. 2. Single-cell RNA sequencing analysis of testes from a normal control and the SSX1F63fsindividual.**

**A** UMAP plot showing 12 testicular cell types in the normal control and the patient, with cell-type annotations.

**B** Dot plot showing the expression patterns of representative marker genes across the 12 major cell types identified in human testicular scRNA-seq data.

**C** Stacked bar chart illustrating the proportions of the 12 major testicular cell types in the normal control and the SSX1F63fsindividual.

**D** Volcano plot showing differentially expressed genes in elongating spermatids between the normal control and the SSX1F63fsindividual.


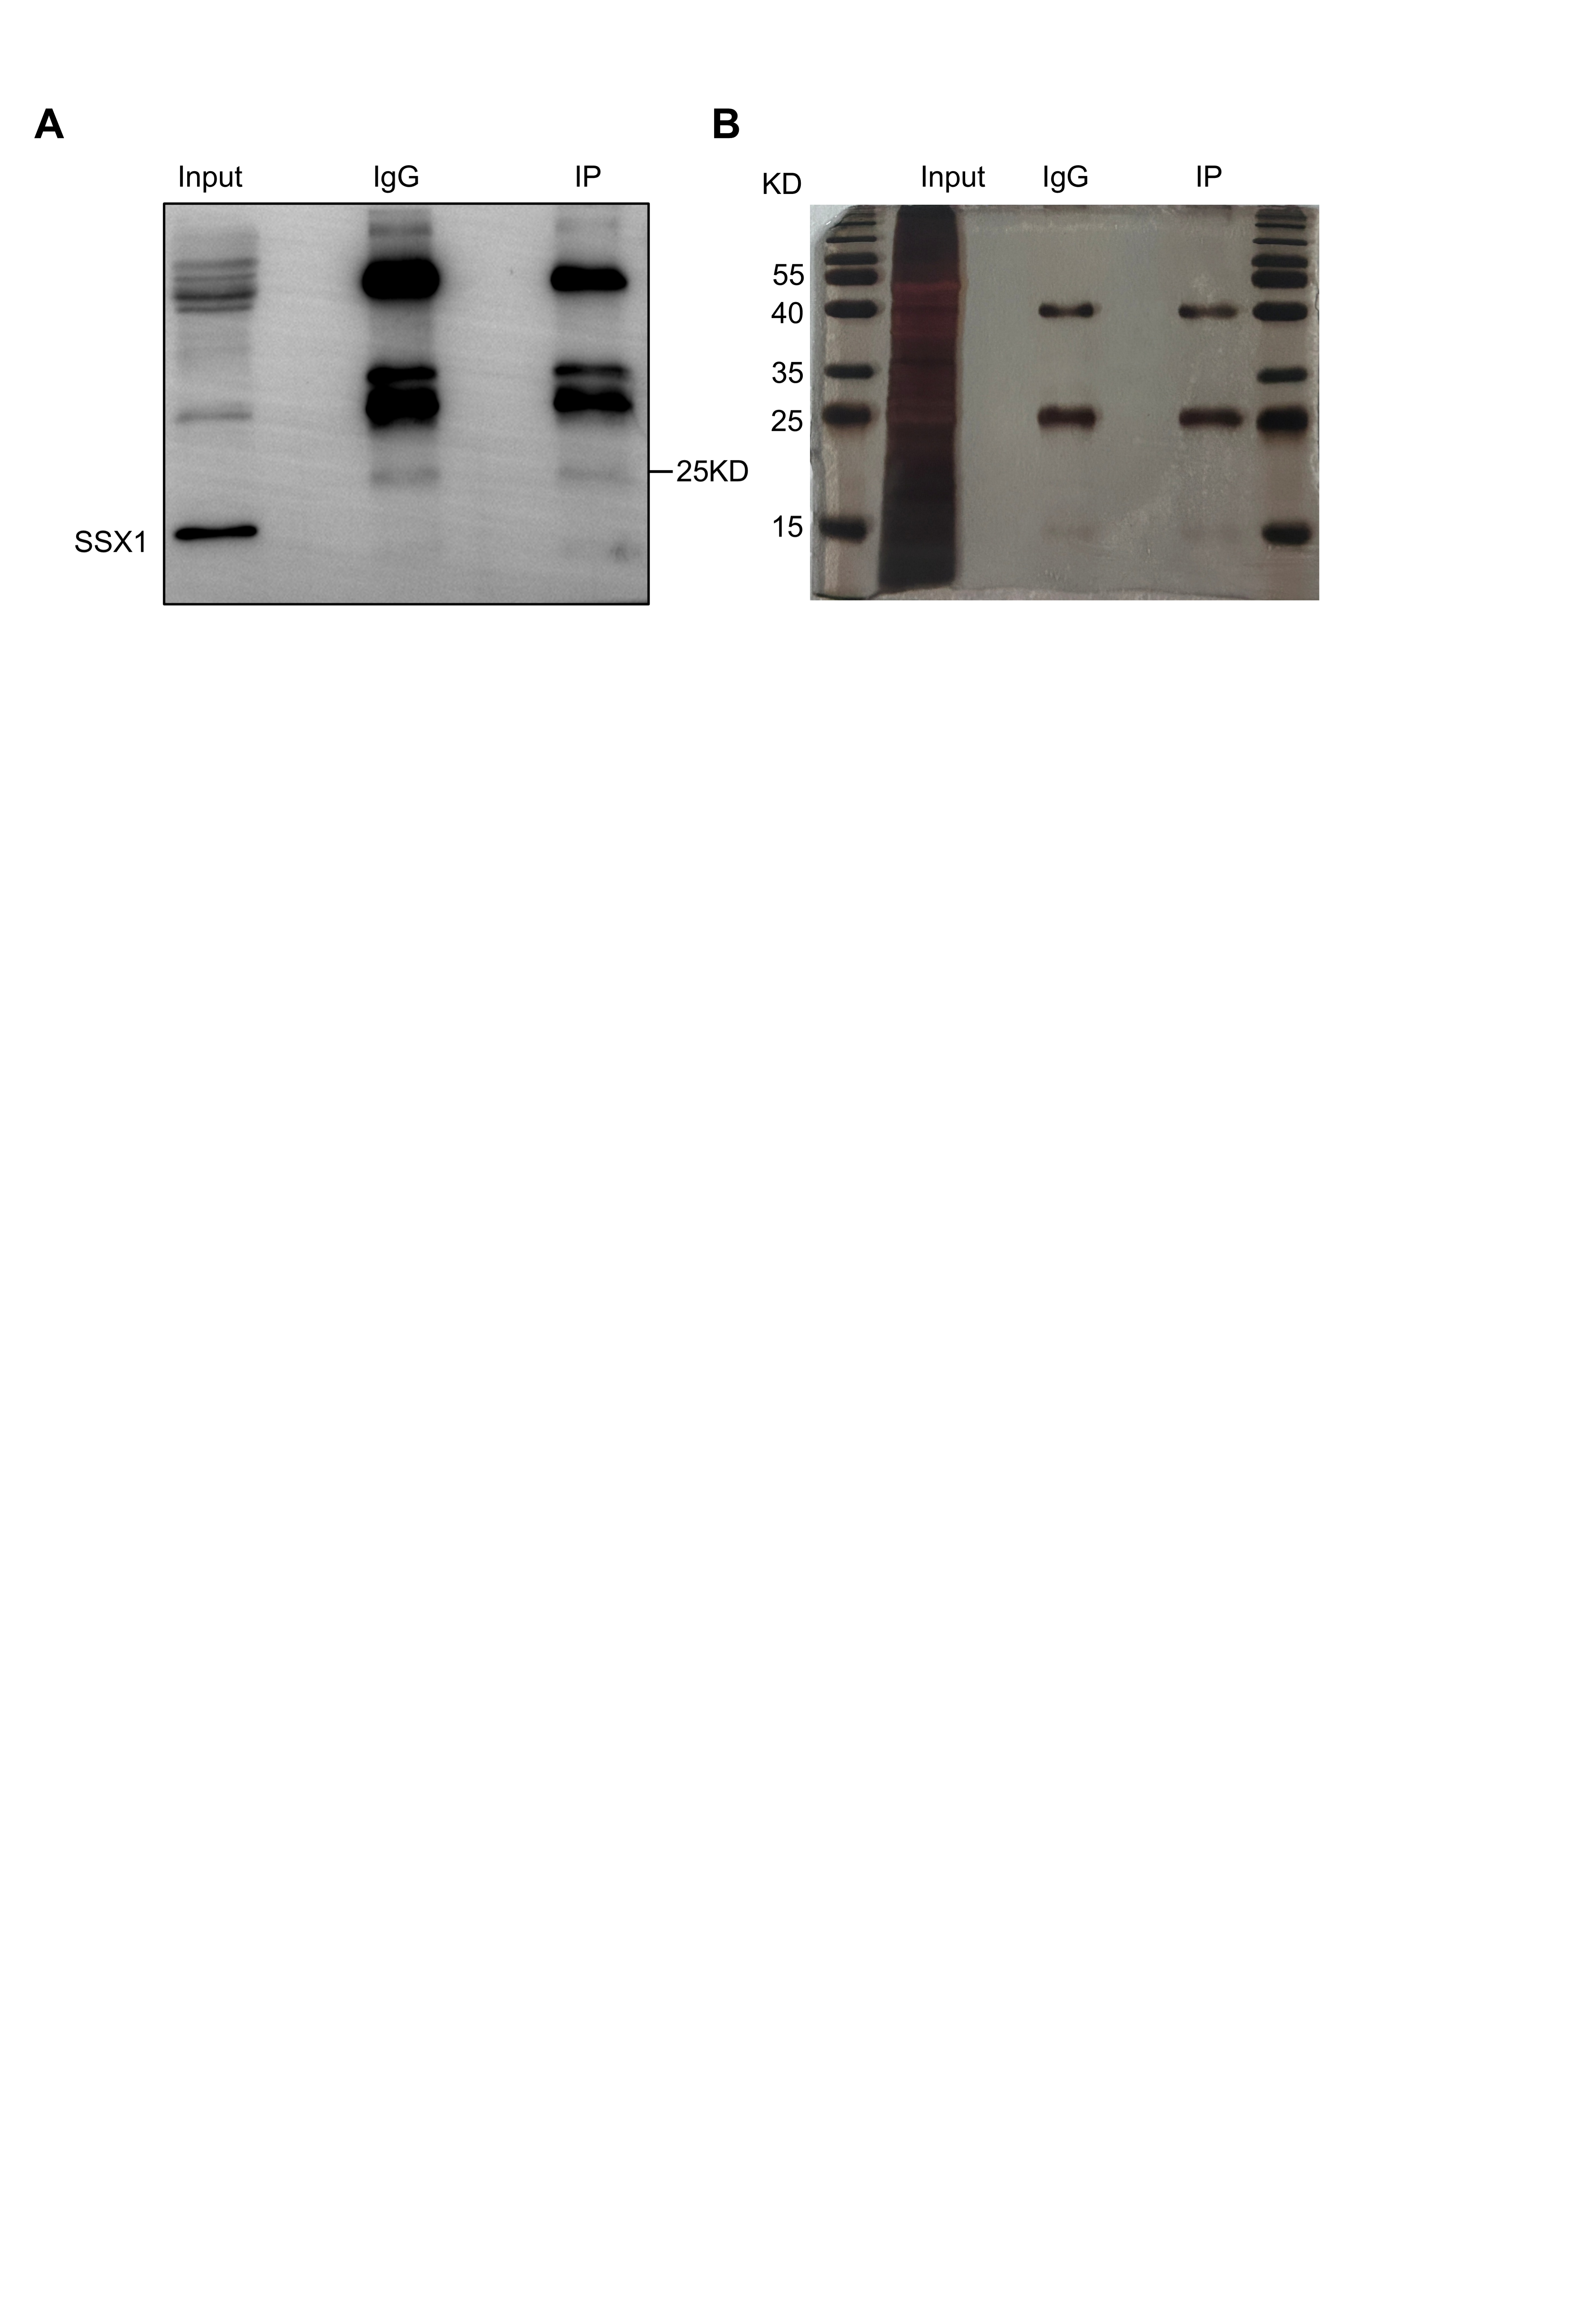


**Supplemental Fig. 3. Western blot and silver staining of SSX1 immunoprecipitates.**

**A** Western blot analysis of SSX1 immunoprecipitation, showing input lysate, SSX1 IP, and IgG control.

**B** Silver staining of SSX1 immunoprecipitation samples, including input, SSX1 IP, and IgG control.
