# Supplementary material for: Primate-specific SSX1 is required for CPSF6-dependent spermatocyte transcription and human fertility
Source: Research Square preprint supplement (doi:10.21203/rs.3.rs-8516172/v1), 2026-02-16
Supplement: Supplementary file 2 [file 932dc7da14e5aa7c53a93362.docx]

| **Table S1** Primer information and expected size of PCR products. | |
| --- | --- |
| SSX1-F | TCGAAGGGAGTGTCAGAAGC |
| SSX1-R | CTCATCAAGGGCATGTGTCG |
| Wild-type | 236bp |
| Mutant-type | 292bp |
